# Supplementary material for: A blue 4′,7-diaminoflavylium cation showing an extended pH range stability
Source: Royal Society of Chemistry journal article supplement (doi:10.1039/c6cp00890a), 2016-01-01
Supplement: c6cp00890a1.pdf [file c6cp00890a1.pdf]

## A Blue 4',7-Diaminoflavylum Cation Showing an Extended pH Range Stability

Arnaud Tron,<sup>a</sup> Sandra Gago,<sup>b</sup> Nathan D. McClenaghan,<sup>a\*</sup> A. Jorge Parola,<sup>b</sup> and Fernando Pina<sup>b\*</sup>

<sup>a</sup> Institut des Sciences Moléculaires, CNRS UMR 5255, Univ. Bordeaux, 33405 Talence, France

nathan.mcclenaghan@u-bordeaux.fr

<sup>b</sup> LAQV, REQUIMTE, Departamento de Química Faculdade de Ciência e Tecnologia, Universidade NOVA de Lisboa, 2829-516 Caparica, Portugal.

fp@fct.unl.pt

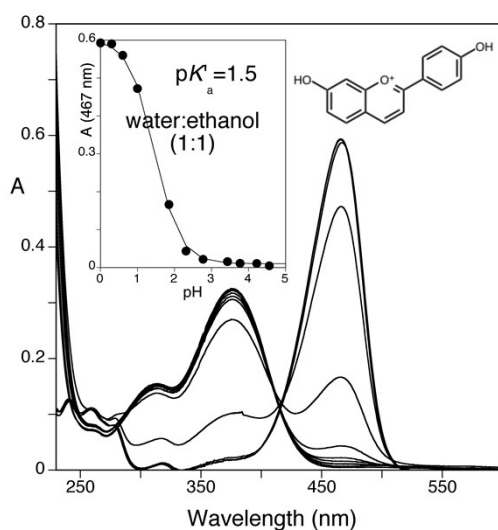

**Figure S1.** Spectral variations of the model compound 4',7-dihydroxyflavylum in water:ethanol (1:1, v/v)

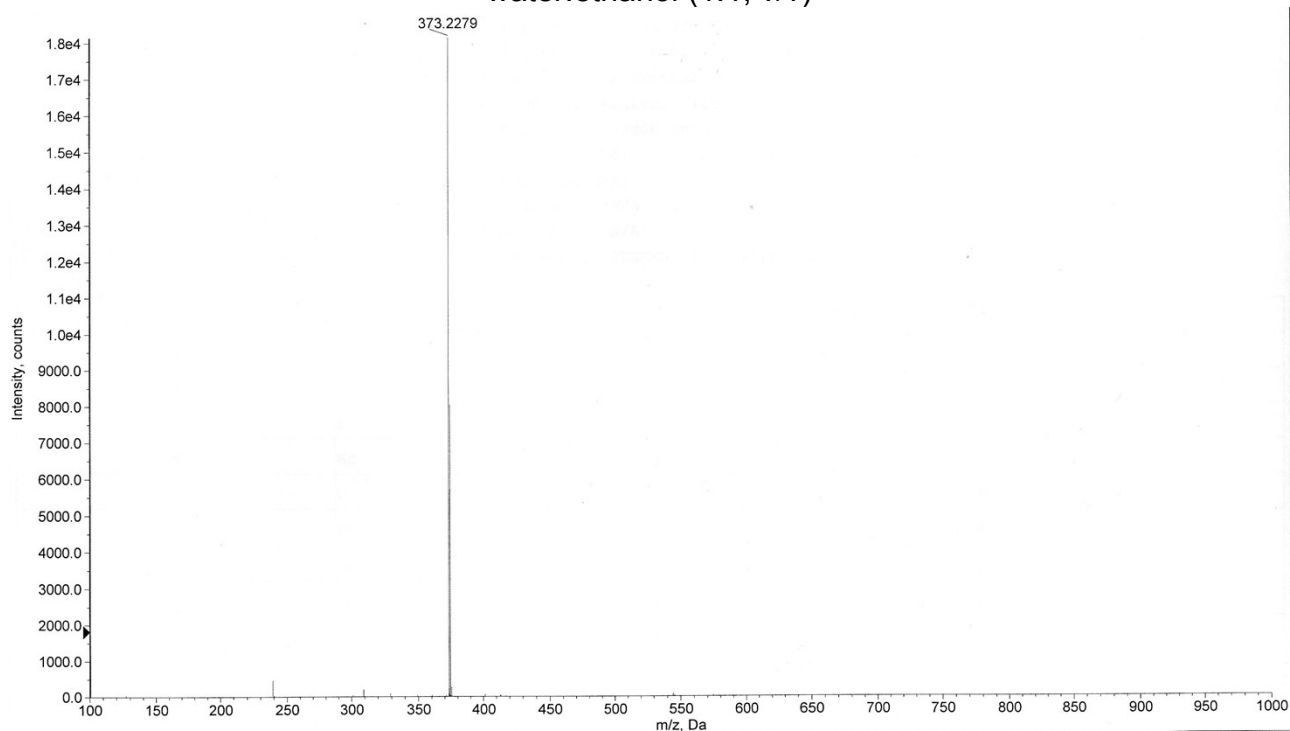

**Figure S2.** HRMS (ESI) of Compound 1.

# NMR Spectra of Flavylium 1

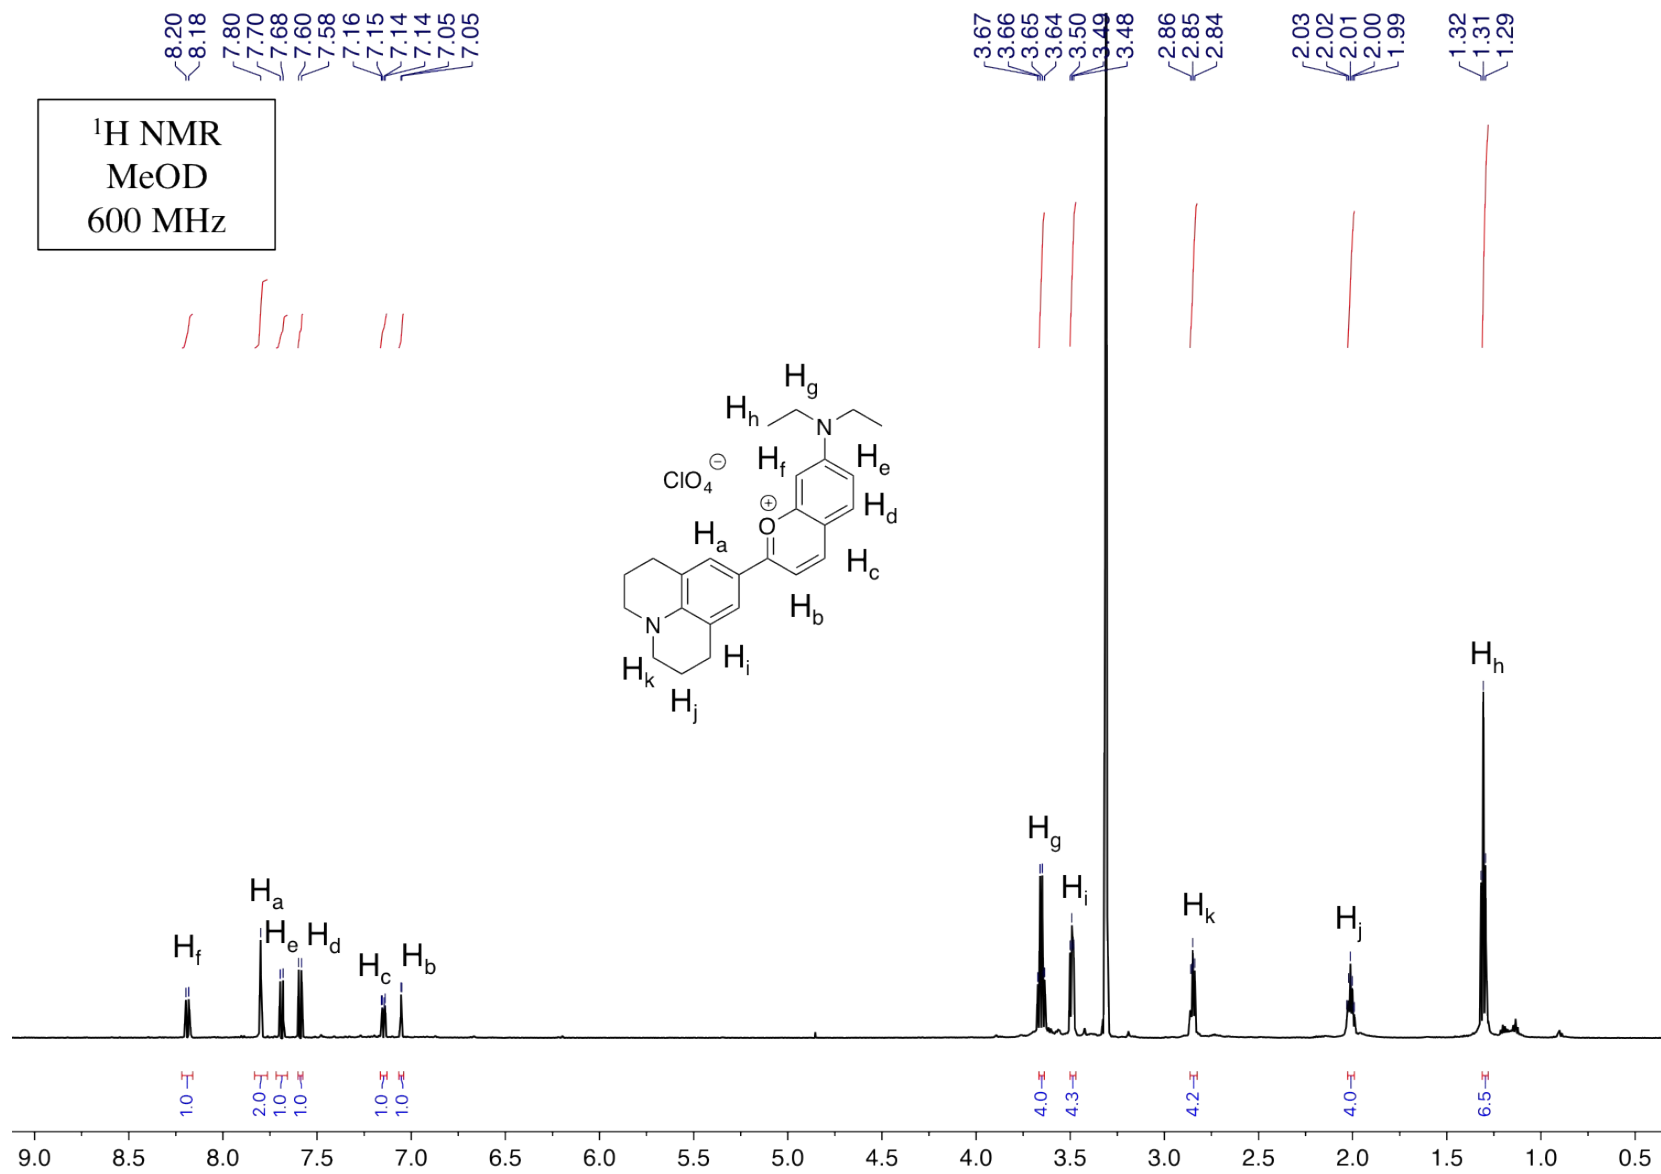

Figure S3. <sup>1</sup>H NMR spectrum of flavylium 1 in MeOD at 298 K on a 600 MHz spectrometer.

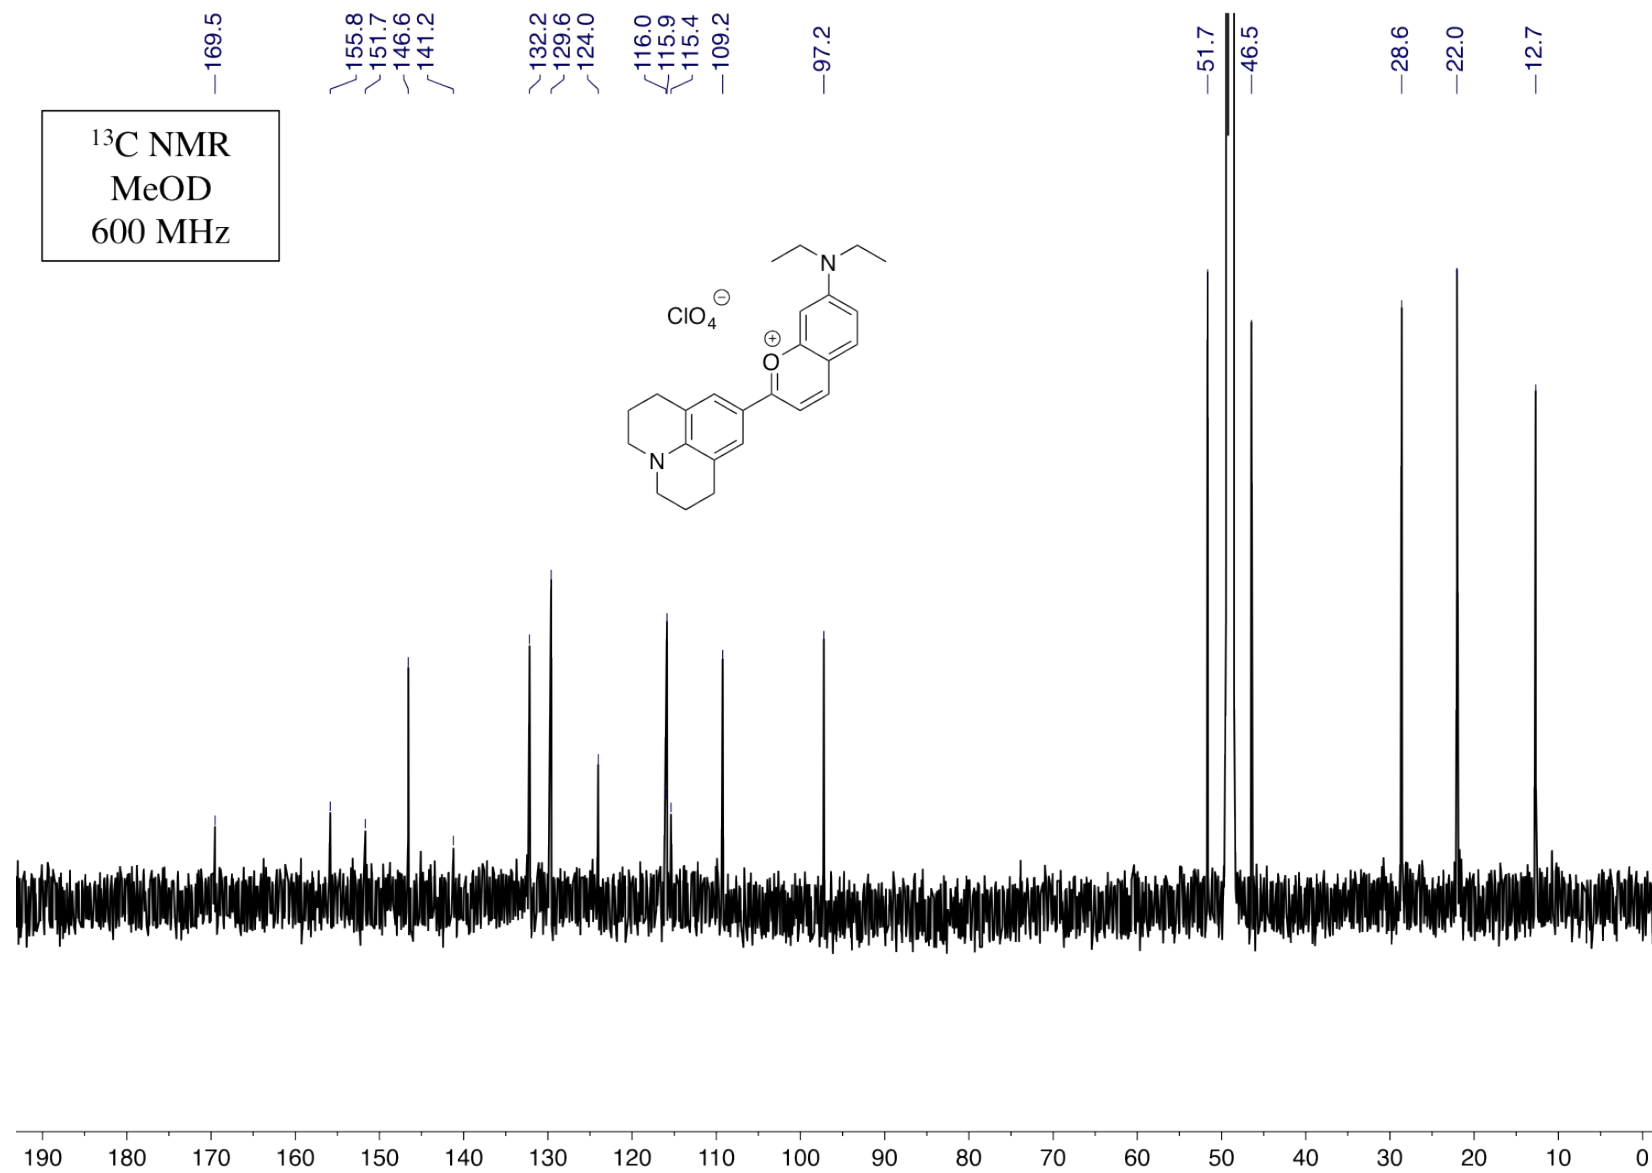

**Figure S4.** <sup>13</sup>C NMR spectrum of flavylum 1 in MeOD at 298 K on a 600 MHz spectrometer.
